# Supplementary material
Source: bioRxiv or medRxiv preprint supplement (https://www.biorxiv.org/highwire/filestream/22974/field_highwire_adjunct_files/0/082651-1.pdf)
Supplement: Supplementary file [file 082651-1.pdf]

Supplementary Figure 1: Positive and negative control cell lines were used as positive and negative controls for HPV16 (A,B) and HPV18 (C,D) PCR.

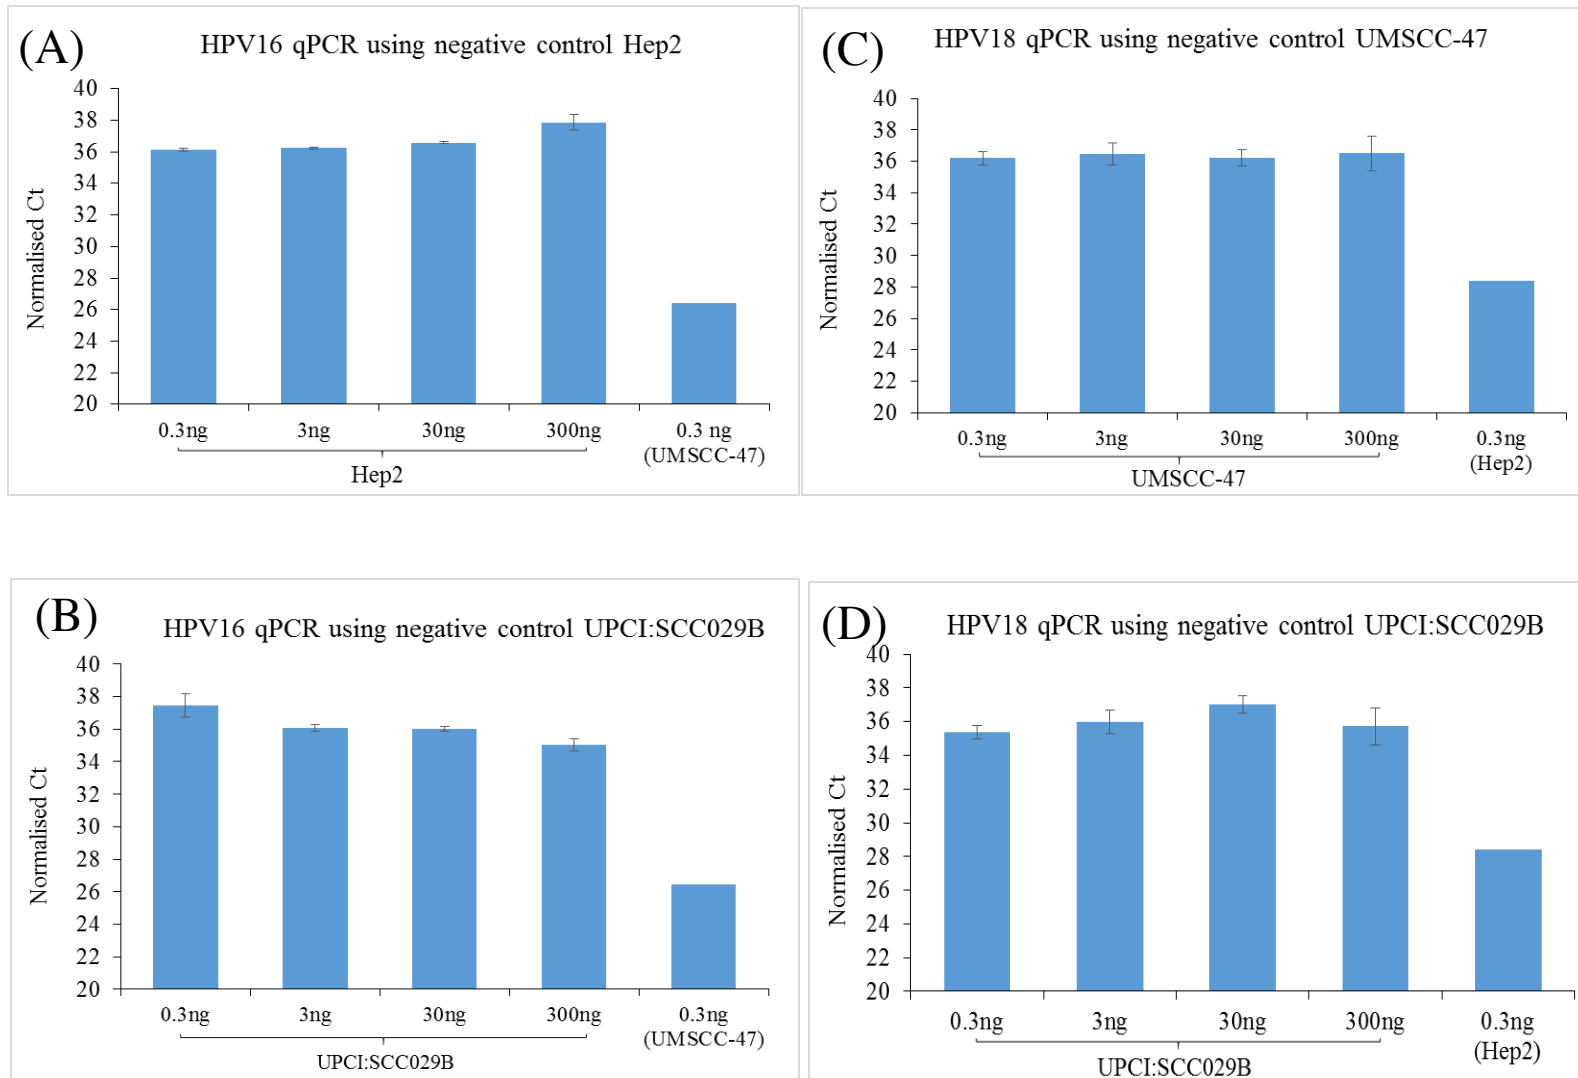

Supplementary Figure 2: Representative image for p16 immunohistochemical staining (IHC) in -ve OSCC +ve OSCC and cervical cancer (+ve control) samples.

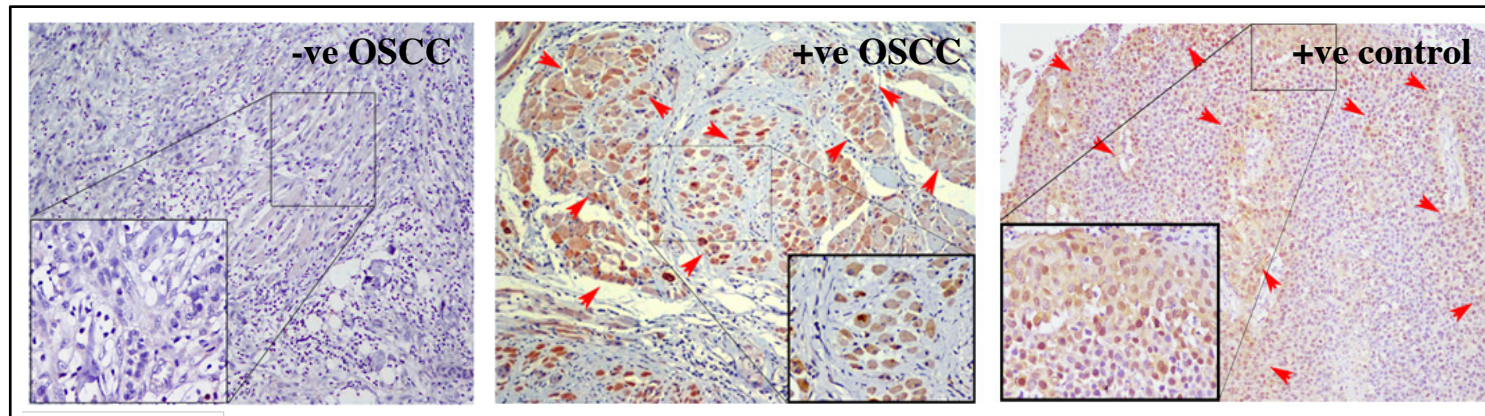

Supplementary Figure 3: Efficient amplification of serially diluted HPV16/18 cloned plasmids.

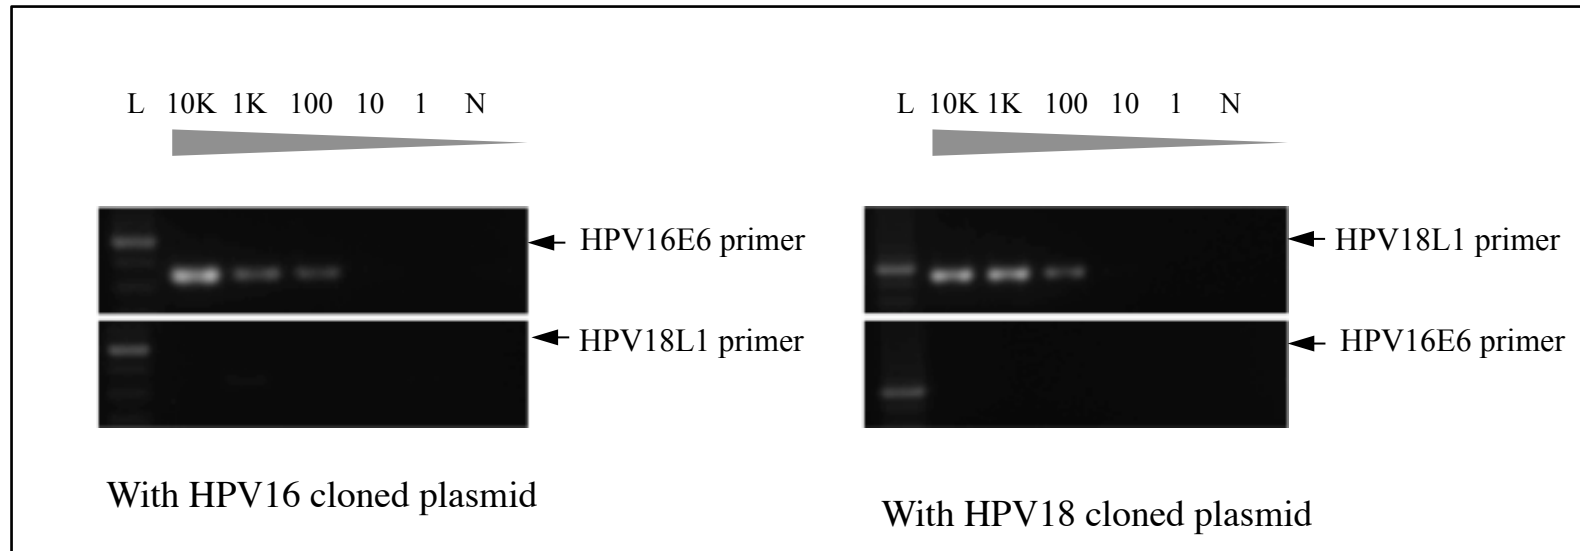

Supplementary Figure 4: PCR with OSCC tumor DNA.

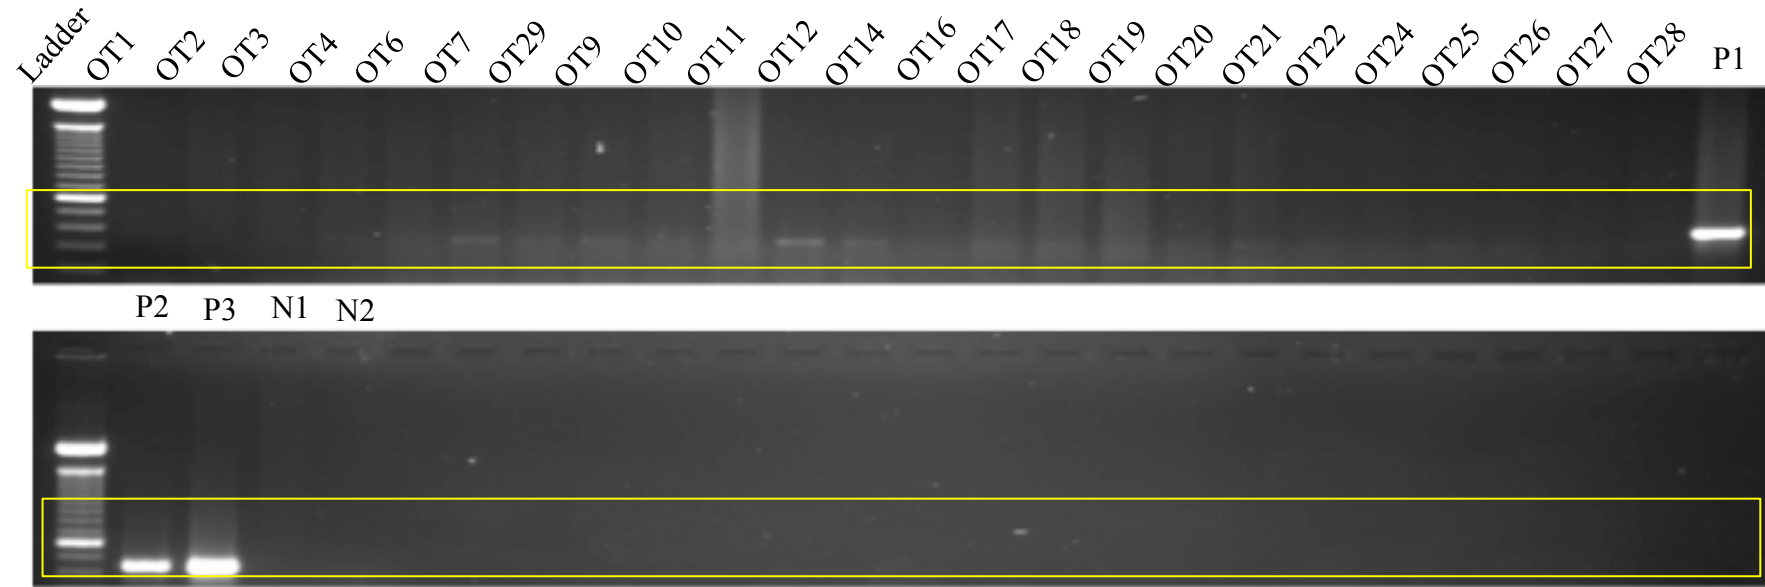

- P1-positive control cervical DNA sample1
- P2-positive control cervical DNA sample2
- P3-UMSCC47 DNA (HPV16 positive cell line)
- N1-UPCI:SCC029B DNA (300ng)
- N2-No Template Control

Supplementary Figure 4, contd.: PCR with OSCC tumor DNA

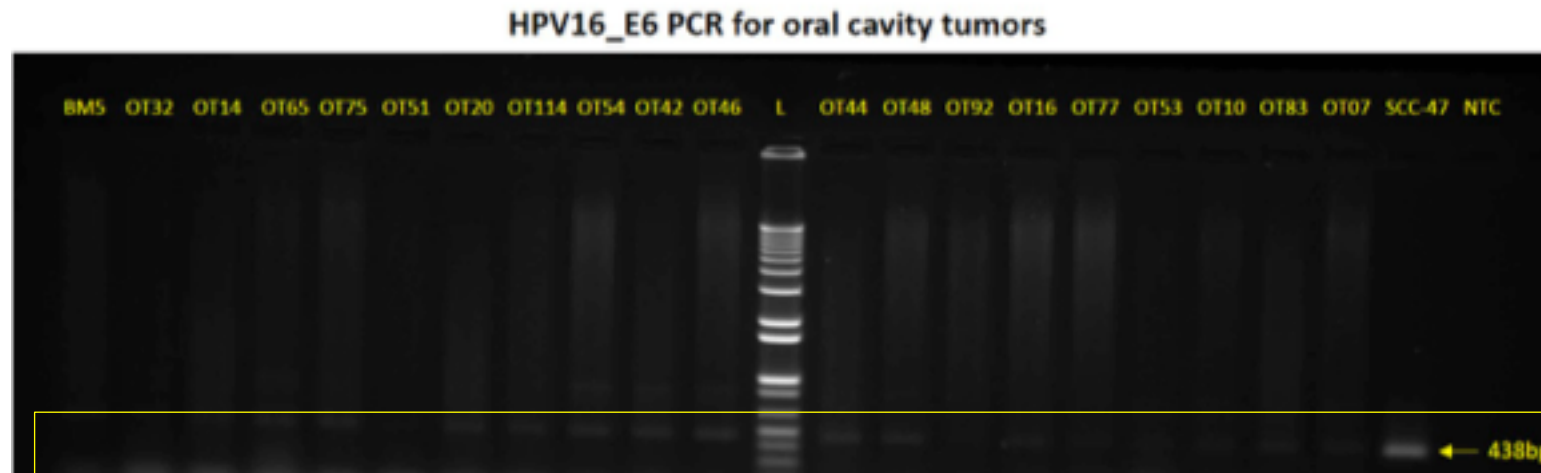

HPV18L1 PCR for oral tumors (using cell lines as p-ve & +ve controls)

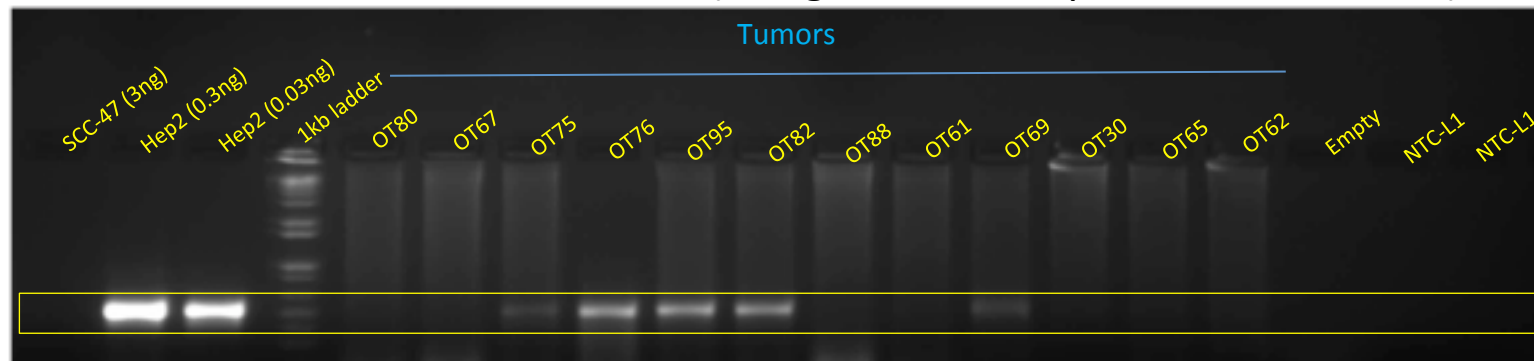

Supplementary Figure 4, contd.: PCR with OSCC tumor DNA

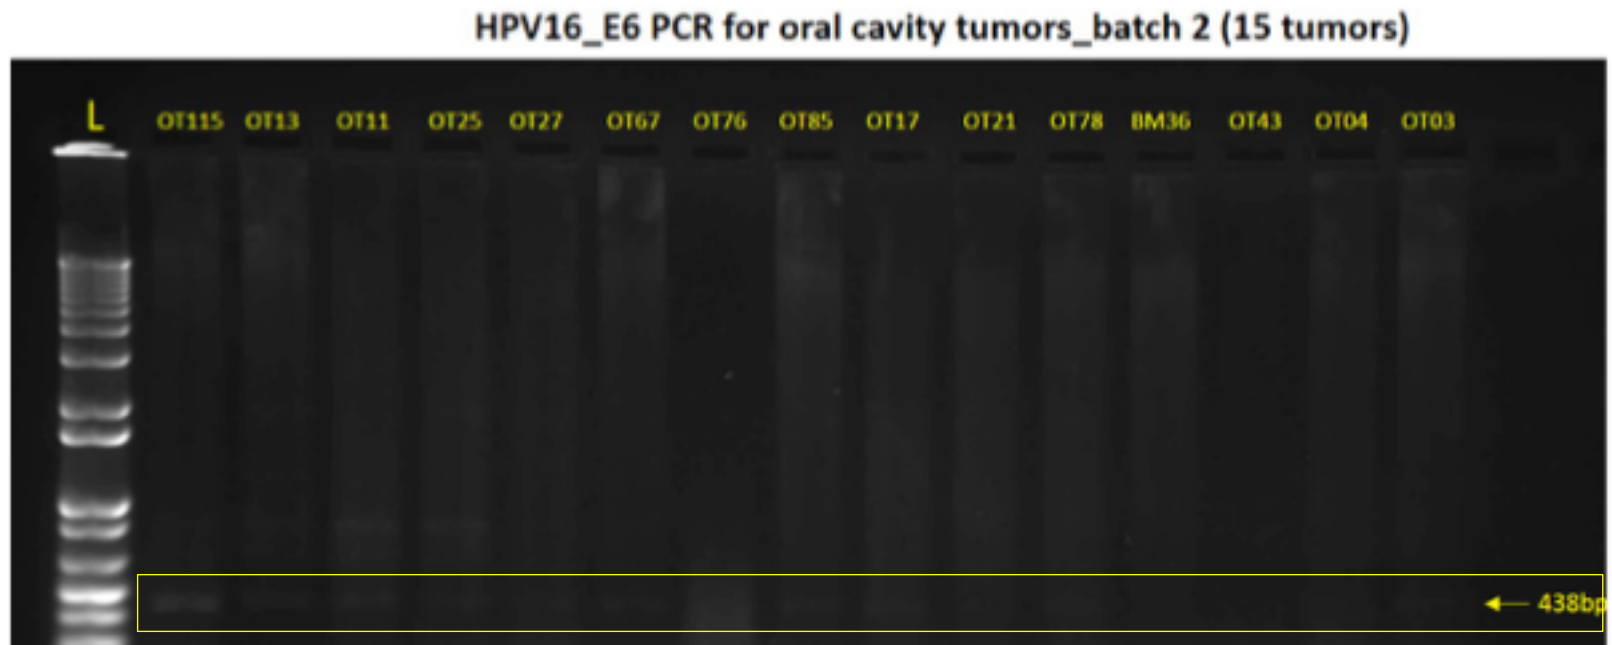

Supplementary Figure 4, contd.: PCR with OSCC tumor DNA

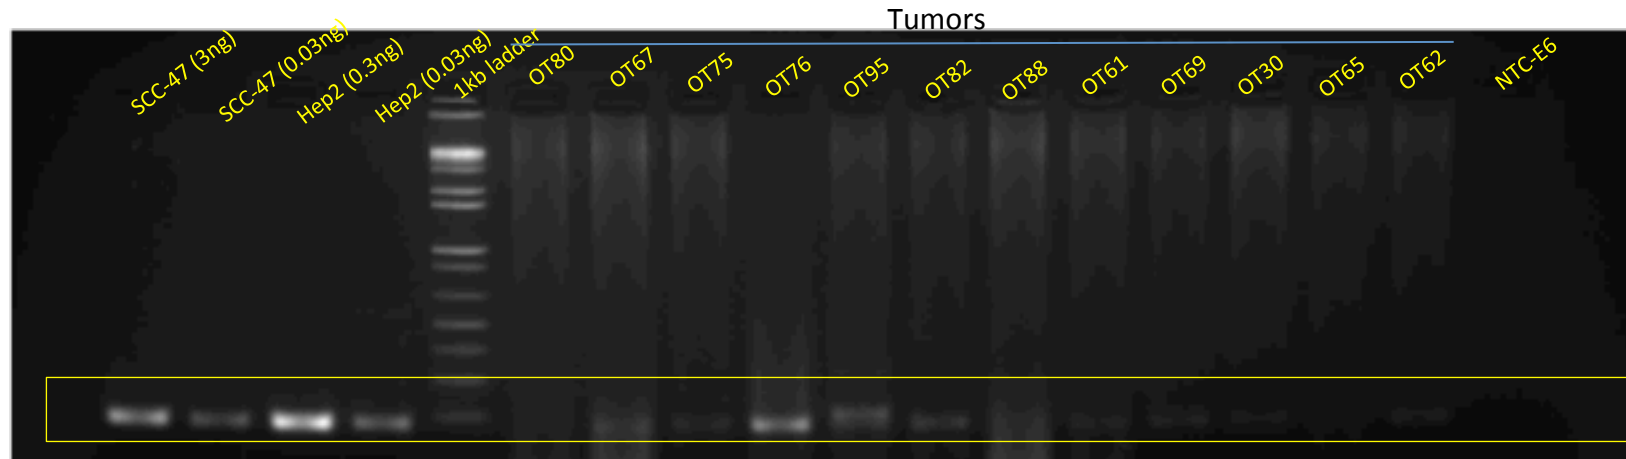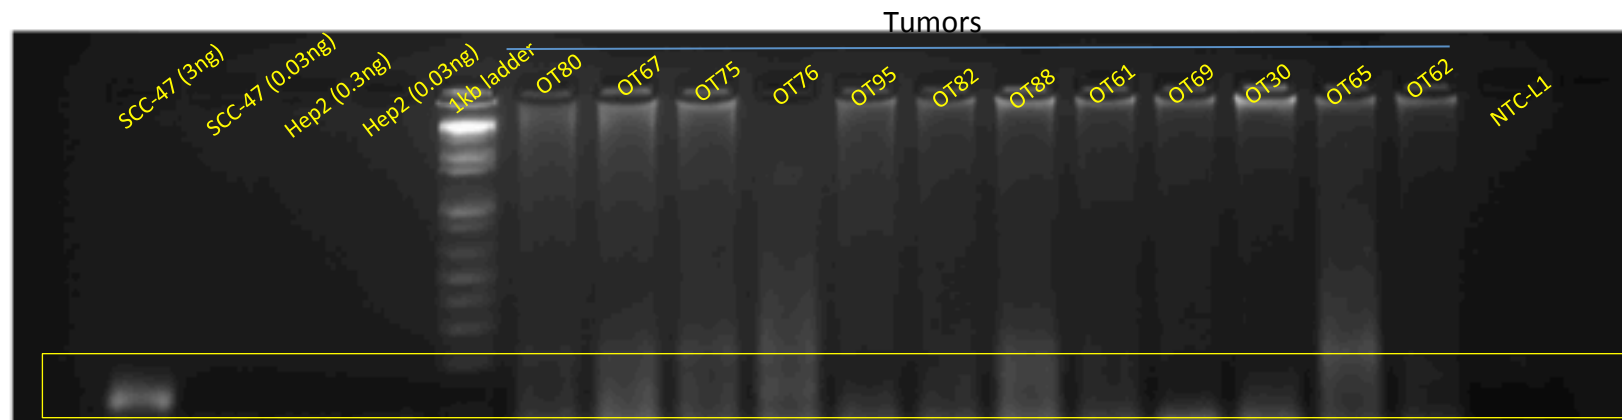

Supplementary Figure 5: Inhibition of amplification reactions at high concentration of tumor genomic DNA with positive cell line spike-in experiment.

|              |       |       |       |       |       |        |
|--------------|-------|-------|-------|-------|-------|--------|
| UMSCC-47 DNA | 0.3ng | -     | 3ng   | 3ng   | 3ng   | 3ng    |
|              |       |       | +     | +     | +     | +      |
| Tumor DNA    | -     | 300ng | 300ng | 600ng | 900ng | 1200ng |

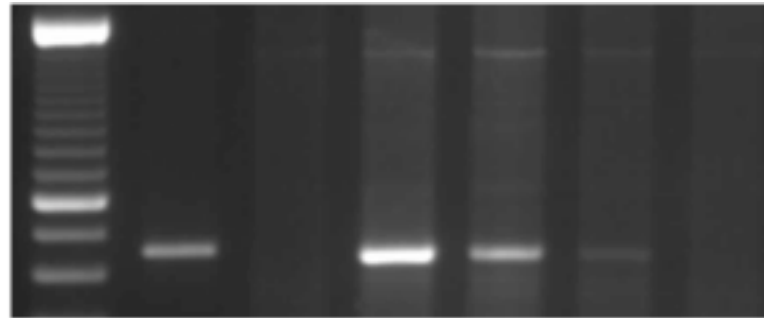

**PGMY09-11 PCR using tumor DNA spiked with HPV positive UMSCC-47 DNA**



Supplementary Figure 6: An increase in amplification cycles did not yield better results.

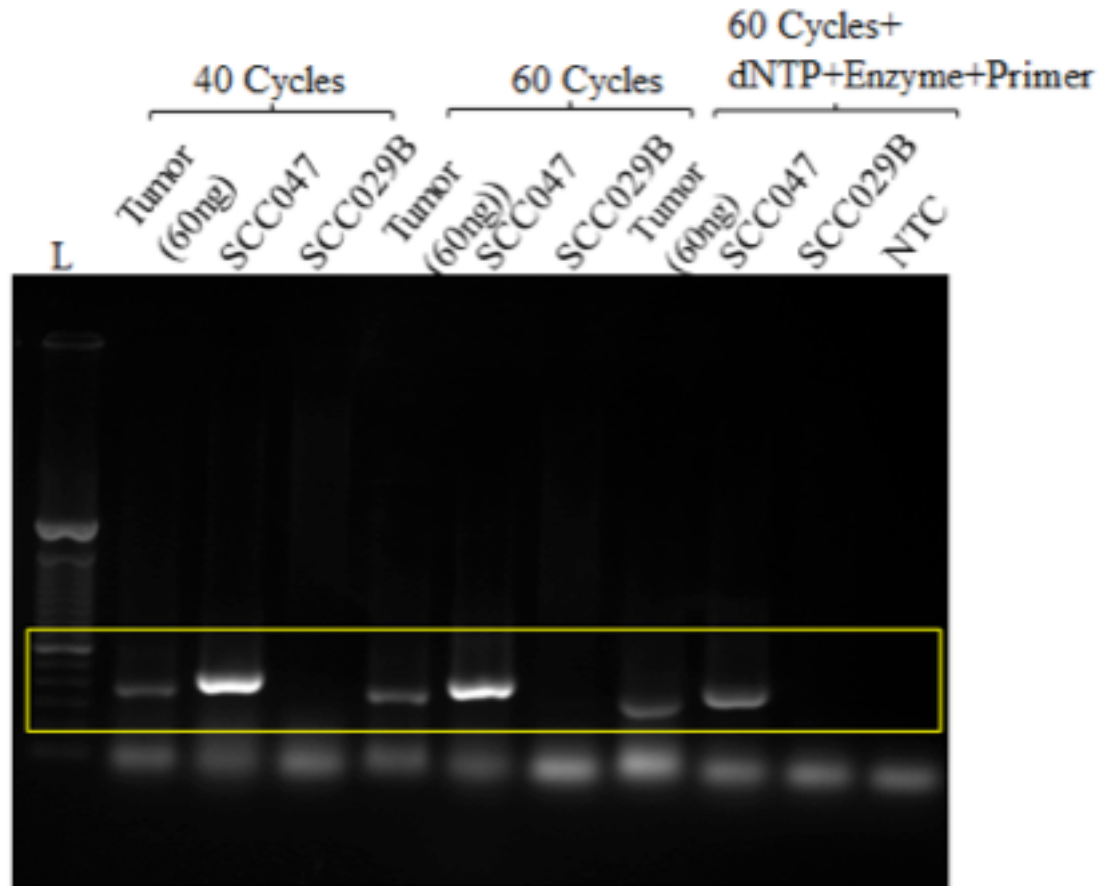

Supplementary Figure 7: HPV E2PCR to test viral integration into host genomes.

HPVE2 PCR using w1-w2 primer (Sengupta et al, 2006)

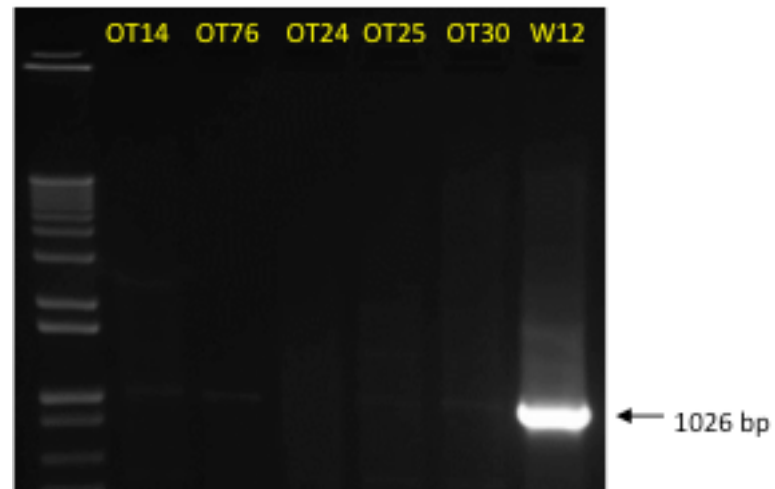

Supplementary Figure 8: KM survival analysis with tumor attributes. With tumor differentiation (A), stage (B-D), habits (E-H), age (I), and nodal status (J).

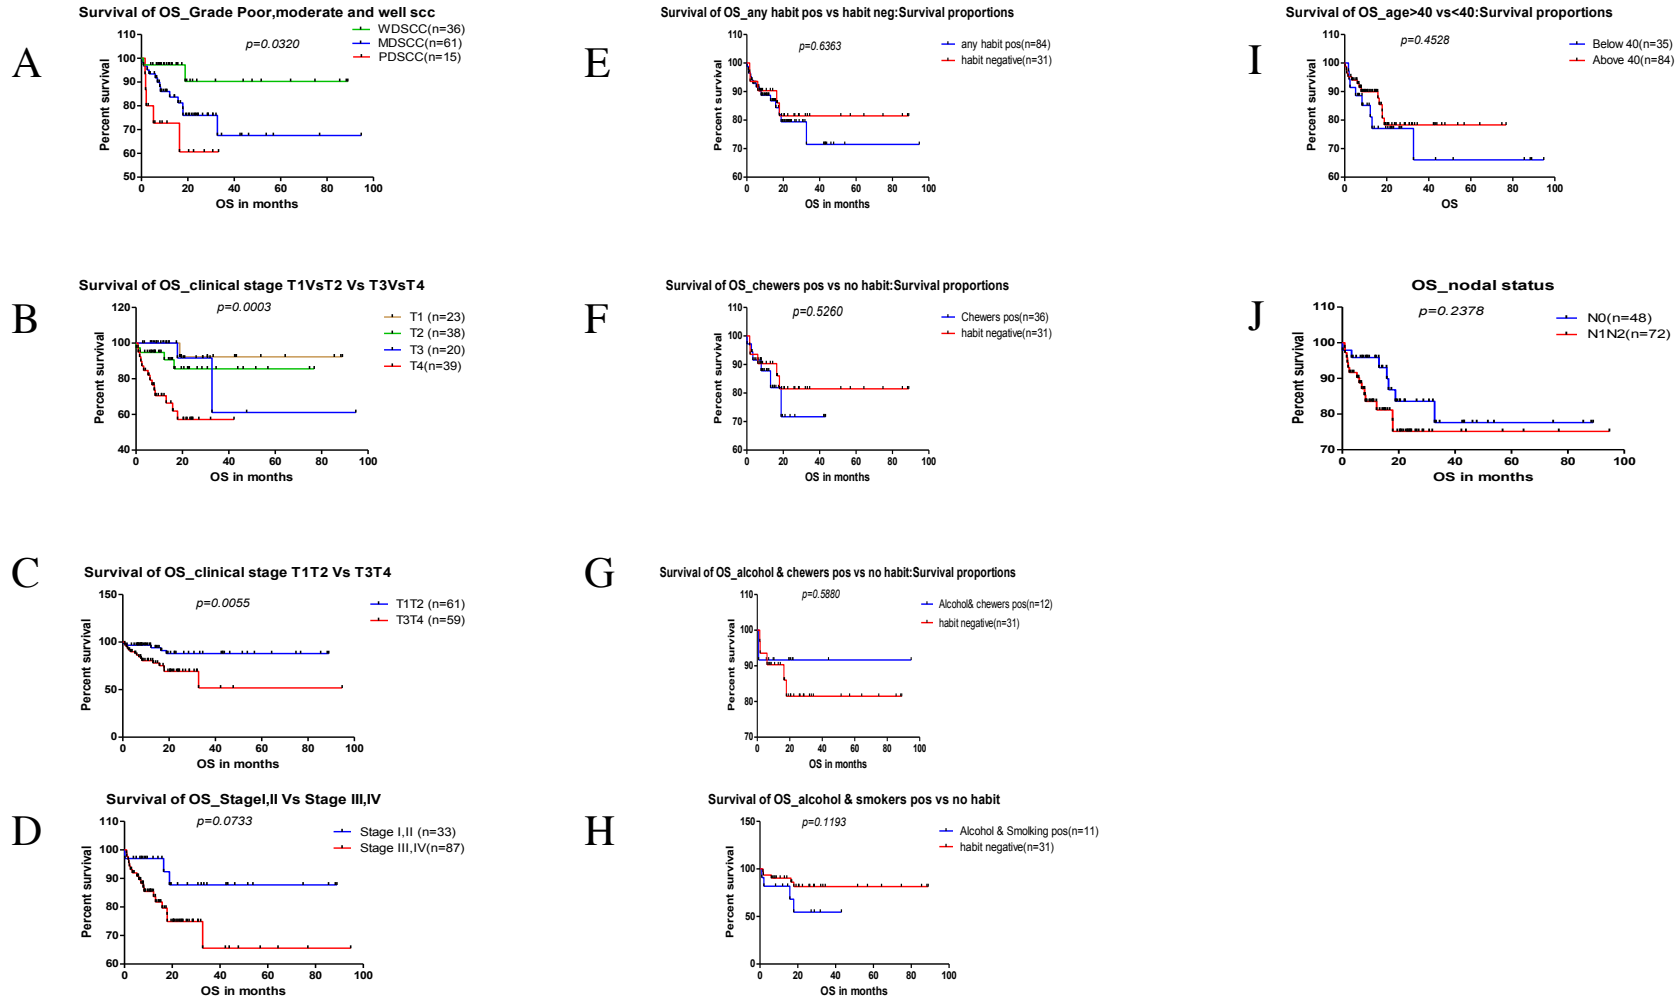

Supplementary Figure 9: KM survival analysis with p16 expression (A,B), HPV DNA as measured by PCR (C,D), qPCR (E-H), ddPCR(I,J), positive in 3/3 DNA-based method (K,L), and E6/E7 mRNA (M,N).

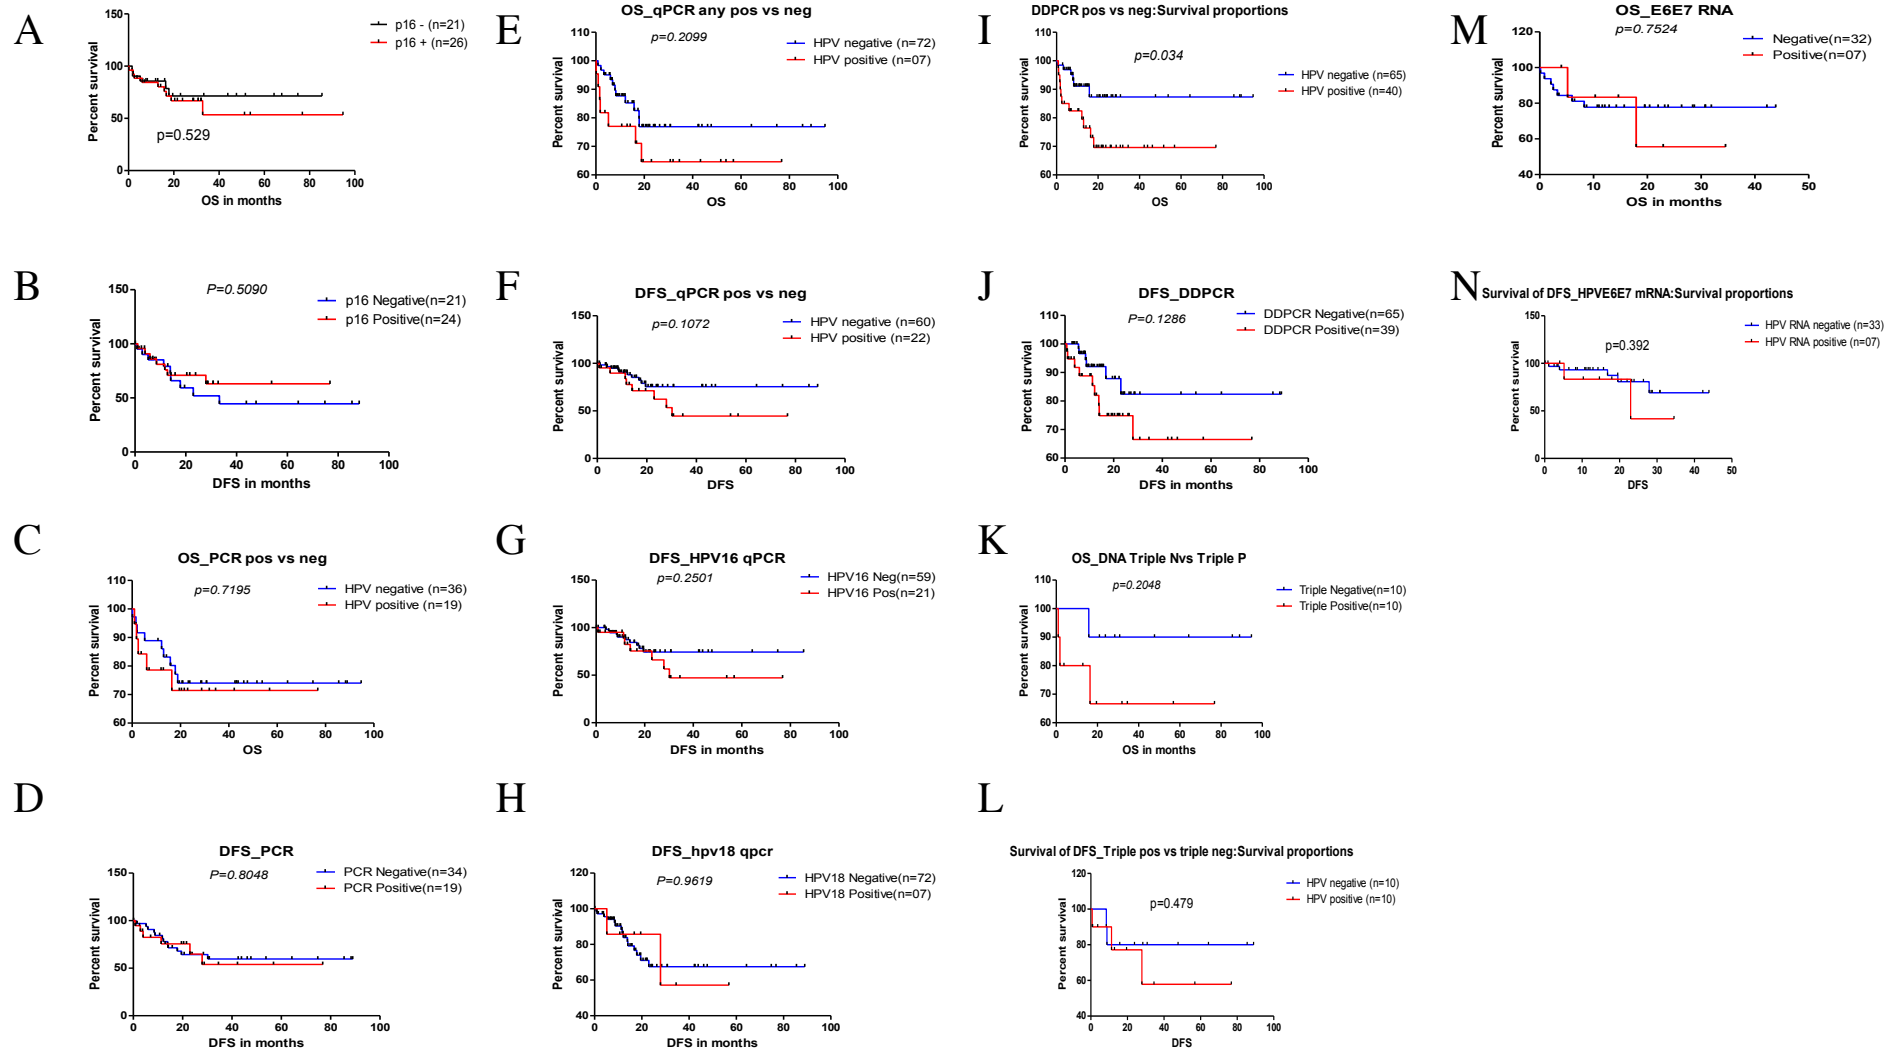

# Supplementary Figure 10: KM survival analysis of tumors in various somatic mutational background (A-F).

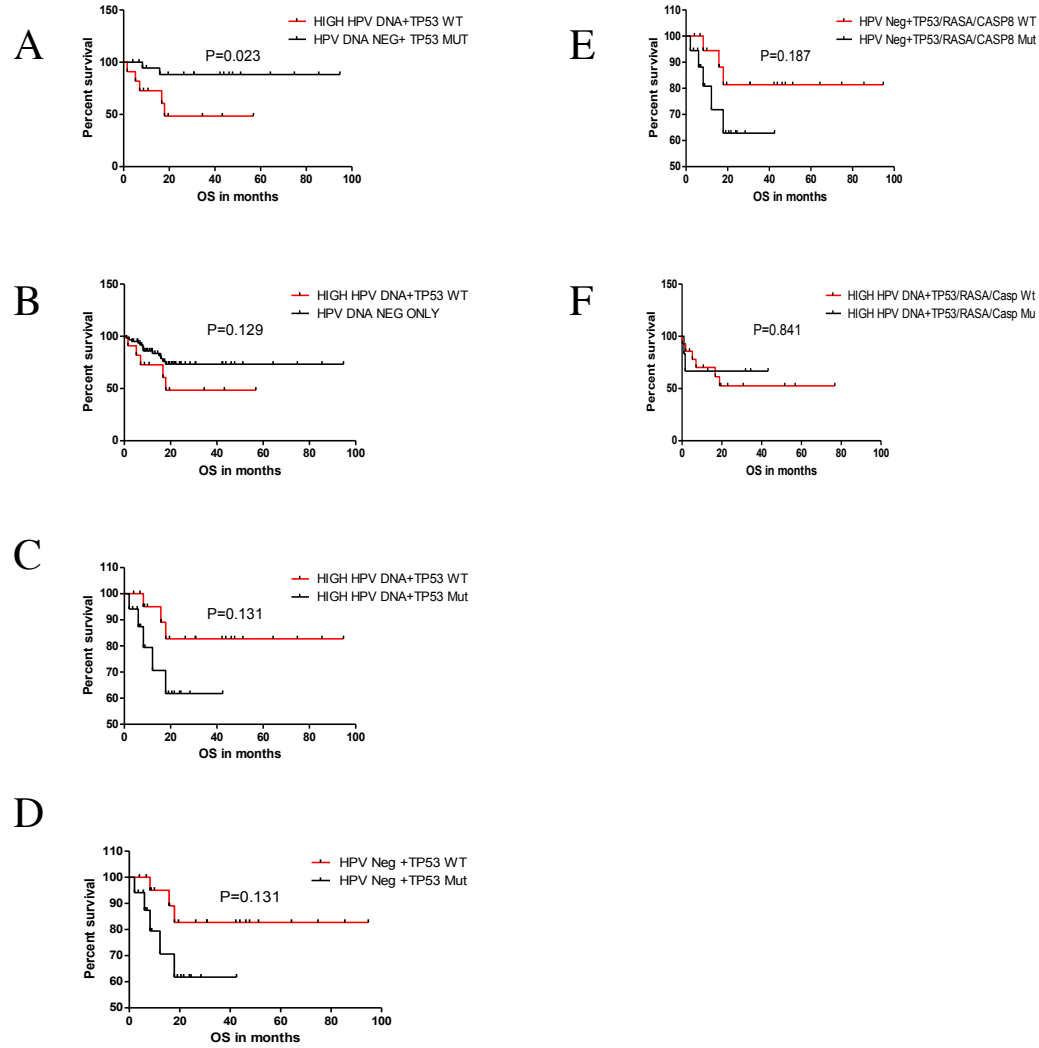

**Supplementary Table 1: Patients (n = 153) used in the study.**

| <i>Characteristics</i>            |                            | <i>Number</i> |
|-----------------------------------|----------------------------|---------------|
| Primary site                      |                            |               |
|                                   | Buccal mucosa              | 41            |
|                                   | Oral tongue                | 112           |
| Gender                            |                            |               |
|                                   | Male                       | 114           |
|                                   | Female                     | 39            |
| Age                               |                            |               |
|                                   | >40                        | 112           |
|                                   | <=40                       | 40            |
|                                   | NA                         | 1             |
| Risk habits                       |                            |               |
|                                   | Alcohol                    | 4             |
|                                   | Chewing                    | 43            |
|                                   | smoking                    | 6             |
|                                   | Alcohol+ chewing           | 14            |
|                                   | smoking + alcohol          | 16            |
|                                   | smoking + chewing          | 9             |
|                                   | smoking + alcohol+ chewing | 10            |
|                                   | No habits                  | 44            |
|                                   | NA                         | 7             |
| Tumor clasification/stage         |                            |               |
|                                   | I+II                       | 43            |
|                                   | III+IV                     | 109           |
|                                   | NA                         | 1             |
| Differentiation                   |                            |               |
|                                   | Well                       | 48            |
|                                   | Moderate                   | 73            |
|                                   | Poor                       | 20            |
|                                   | NA                         | 12            |
| Abbreviations: NA = Not Available |                            |               |

**Supplementary Table 2: Primer and probe sequences along with amplicon size and the conditions of amplification reactions used for nucleic acid based detection.**

| Parameter                            | Assay                                                                 | Primer  | Sequence                             | Domain | Region (bp)      | Amplicon Size (bp) | PCR Conditions   | Reference if any                                                      |
|--------------------------------------|-----------------------------------------------------------------------|---------|--------------------------------------|--------|------------------|--------------------|------------------|-----------------------------------------------------------------------|
|                                      | PCR                                                                   | HPV16L1 |                                      | L1     | 6030 - 6180      | 151                | 94°C : 3 min     | Pool of 11F & 9 R primers form Gravitt et al., J Clin Microbiol, 2000 |
|                                      |                                                                       |         | 5' TGC TAG TGC TTA TGC AGC AA 3'     |        |                  |                    | 94°C : 60 sec    |                                                                       |
|                                      |                                                                       |         | 3' ATT TAC TGC AAC ATT GGT AC 5'     |        |                  |                    | 55°C : 60 sec    |                                                                       |
|                                      |                                                                       |         |                                      |        |                  |                    | 72°C : 60 sec    |                                                                       |
|                                      |                                                                       |         | 40 cycles                            |        |                  |                    |                  |                                                                       |
|                                      |                                                                       |         | 72°C : 2 min & 4°C hold              |        |                  |                    |                  |                                                                       |
|                                      |                                                                       | GP5+/6+ |                                      | L1     | 6624- 6746       | 150                | 94°C : 5 min     |                                                                       |
|                                      |                                                                       |         | 5' TTT GTT ACT GTG GTA GAT AC 3'     |        |                  |                    | 94°C : 60 sec    |                                                                       |
|                                      |                                                                       |         | 3' GAA AAA TAA ACT GTA AAT CA 5'     |        |                  |                    | 57.8 °C : 60 sec |                                                                       |
|                                      |                                                                       |         |                                      |        |                  |                    | 72°C : 30 sec    |                                                                       |
|                                      |                                                                       |         | 40 cycles                            |        |                  |                    |                  |                                                                       |
|                                      |                                                                       |         | 72°C : 7 min & 4°C hold              |        |                  |                    |                  |                                                                       |
|                                      |                                                                       | MY09/11 |                                      | L1     | 6602 - 7034      | 450                | 94°C : 5 min     |                                                                       |
|                                      |                                                                       |         |                                      |        |                  |                    | 94°C : 60 sec    |                                                                       |
|                                      |                                                                       |         | 3' GCM CAG GGW CAT AAY AAT GG 5'     |        |                  |                    | 57.8 °C : 60 sec |                                                                       |
|                                      |                                                                       |         | 5' CGT CCM ARR GGA WAC TGA TC 3'     |        |                  |                    | 72°C : 60 sec    |                                                                       |
|                                      |                                                                       |         | 40 cycles                            |        |                  |                    |                  |                                                                       |
|                                      |                                                                       |         | 72°C : 7 min & 4°C hold              |        |                  |                    |                  |                                                                       |
|                                      |                                                                       | CP I/II |                                      | E1     | 1777 - 1942      | 188                | 94°C : 5 min     |                                                                       |
|                                      |                                                                       |         | 5' TTA TCW TAT GCC CAY TGT ACC AT 3' |        |                  |                    | 94°C : 60 sec    |                                                                       |
| 3' ATG TTA ATW SAG CCW CCA AAA TT 5' | 61.7°C:60sec                                                          |         |                                      |        |                  |                    |                  |                                                                       |
|                                      | 72°C : 30 sec                                                         |         |                                      |        |                  |                    |                  |                                                                       |
|                                      | 40 cycles                                                             |         |                                      |        |                  |                    |                  |                                                                       |
|                                      | 72°C : 7 min & 4°C hold                                               |         |                                      |        |                  |                    |                  |                                                                       |
| PGMY09/11                            |                                                                       | L1      | 6602 - 7034                          | 450    | 94°C : 5 min     |                    |                  |                                                                       |
|                                      | Pool of 11F & 9 R primers form Gravitt et al., J Clin Microbiol, 2000 |         |                                      |        | 94°C : 60 sec    |                    |                  |                                                                       |
|                                      |                                                                       |         |                                      |        | 57.8 °C : 60 sec |                    |                  |                                                                       |
|                                      |                                                                       |         |                                      |        | 72°C : 60 sec    |                    |                  |                                                                       |

**DNA**

|      |                        |                                        |    |             |     |                         |                |
|------|------------------------|----------------------------------------|----|-------------|-----|-------------------------|----------------|
| DNA  | HPV16E6 PCR primer     |                                        |    |             |     | 40 cycles               | Newly designed |
|      |                        |                                        |    |             |     | 72°C : 7 min & 4°C hold |                |
|      |                        | 5' CAG GAG CGA CCC AGA AAG TT 3'       | E6 | 119-556     | 438 | 94°C : 3 min            |                |
|      |                        | 3' CAG CTG GGT TTC TCT ACG TGT 5'      |    |             |     | 94°C : 30 sec           |                |
|      |                        |                                        |    |             |     | 53°C : 30 sec           |                |
|      |                        |                                        |    |             |     | 72°C : 30 sec           |                |
|      | HPV18L1 PCR primer     |                                        | L1 | 6141-6676   | 536 | 40 cycles               |                |
|      |                        | 5' TCG CGT CCT TTA TCA CAG GGC GA 3'   |    |             |     | 72°C : 2 min & 4°C hold |                |
|      |                        | 3' TGC CCA GGT ACA GGA GAC TGT G 5'    |    |             |     | 94°C : 3 min            |                |
|      |                        |                                        |    |             |     | 94°C : 40 sec           |                |
| qPCR | HPV16E6 cloning primer |                                        | E6 | 119 - 556   | 438 | as described above      |                |
|      |                        | 5' CAG GAG CGA CCC AGA AAG TT 3'       |    |             |     |                         |                |
|      |                        | 3' CAG CTG GGT TTC TCT ACG TGT 5'      |    |             |     |                         |                |
|      | HPV16E6 qPCR           |                                        | E6 | 150 - 256   | 107 | 95°C : 3 min            |                |
|      |                        | 5' GCA CAG AGC TGC AAA CAA CT 3'       |    |             |     | 95°C : 30 sec           |                |
|      |                        | 3' GCA TAA ATC CCG AAA AGC AA 5'       |    |             |     | 55°C : 30 sec           |                |
|      |                        | probe-ATTAGAATGTGTGTACTGCAAGCA-FAM-BHQ |    |             |     | 72°C : 30 sec           |                |
|      | HPV18L1 cloning primer |                                        | L1 | 6141 - 6676 | 536 | as described above      |                |
|      |                        | 5' TCG CGT CCT TTA TCA CAG GGC GA 3'   |    |             |     |                         |                |
|      |                        | 3' TGC CCA GGT ACA GGA GAC TGT G 5'    |    |             |     |                         |                |
|      |                        |                                        |    |             |     |                         |                |





Supplementary Table 3: *p*-values from unpaired t-tests measuring significance in differences between differential methylation in 9 HPV associated genes between HPV +ve and HPV -ve group. Group 1: when high-copy and/or HPV E6/E7 RNA is taken into consideration to define HPV positivity, and Group 2: when HPV DNA only, irrespective of copy number, is taken into consideration to define HPV positivity.

| Genes         | Group 1 HPV +ve vs HPV -ve | Group 2 HPV +ve vs HPV -ve |
|---------------|----------------------------|----------------------------|
| <i>FERMT3</i> | < 0.00001                  | 0.0346                     |
| <i>GIT2</i>   | < 0.00001                  | 0.1052                     |
| <i>HK3</i>    | < 0.00001                  | 0.0574                     |
| <i>PRKCZ</i>  | < 0.00001                  | 0.052                      |
| <i>ZCCHC8</i> | < 0.00001                  | 0.0504                     |
| <i>IRF5</i>   | < 0.00001                  | 0.083                      |
| <i>IFFO1</i>  | < 0.00001                  | 0.0608                     |
| <i>ARID3A</i> | < 0.00001                  | 0.0654                     |
| <i>HOXA2</i>  | 0.0074                     | 0.1788                     |
